# Supplementary material for: A machine learning approach for genome-wide prediction of morbid and druggable human genes based on systems-level data
Source: PubMed Central journal article supplement (PMC3045802; doi:10.1186/1471-2164-11-s5-s9), 2010-12-22
Supplement: 1471-2164-11-S5-S9-S1.pdf [file 1471-2164-11-S5-S9-S1.pdf]

Functions and descriptions of the twelve network topological features used as learning attributes for training the classifier algorithm

| Feature                                                                   | Function                                                                                | Description                                                                                                                                                                                                                                    |
|---------------------------------------------------------------------------|-----------------------------------------------------------------------------------------|------------------------------------------------------------------------------------------------------------------------------------------------------------------------------------------------------------------------------------------------|
| Degree centrality related to protein physical interaction                 | $ppi$                                                                                   | Number of undirected links to gene $g$ representing the number of protein physical interactions.                                                                                                                                               |
| Indegree related to metabolic interaction                                 | $metin$                                                                                 | Number of incoming links to gene $g$ representing the number of reactants participating in a metabolic reaction catalyzed by the enzyme encoded by $g$                                                                                         |
| Outdegree related to metabolic interaction                                | $metout$                                                                                | Number of outgoing links from gene $g$ representing the number of products generated by the metabolic reaction catalyzed by the enzyme encoded by $g$                                                                                          |
| Indegree related to transcriptional regulation interaction                | $regin$                                                                                 | Number of incoming links to gene $g$ representing the number of transcription factors regulating $g$                                                                                                                                           |
| Outdegree related to transcriptional regulation interaction               | $regout$                                                                                | Number of outgoing links from gene $g$ representing the number of genes regulated by the transcription factor encoded by $g$                                                                                                                   |
| Clustering coefficient                                                    | $c = \frac{2n_g}{k_g(k_g - 1)}$                                                         | $n_g$ is the number of links connecting the neighbors of $g$ and $k_g$ is the number of links connecting $g$ to its neighbors.                                                                                                                 |
| Betweenness centrality related to all interactions                        | $inbet(g) = \sum_{g_i \neq g \neq g_j} \frac{\sigma_{g_i g_j}(g)}{\sigma_{g_i g_j}}$    | $\sigma_{g_i g_j}$ is the number of shortest paths between $g_i$ and $g_j$ and $\sigma_{g_i g_j}(g)$ is the number of shortest paths between $g_i$ and $g_j$ passing through $g$ . Shortest paths via all types of interactions.               |
| Betweenness centrality related to protein physical interactions           | $inbetppi(g) = \sum_{g_i \neq g \neq g_j} \frac{\sigma_{g_i g_j}(g)}{\sigma_{g_i g_j}}$ | $\sigma_{g_i g_j}$ is the number of shortest paths between $g_i$ and $g_j$ and $\sigma_{g_i g_j}(g)$ is the number of shortest paths between $g_i$ and $g_j$ passing through $g$ . Shortest paths via protein physical of interactions         |
| Betweenness centrality related to metabolic interactions                  | $inbetmet(g) = \sum_{g_i \neq g \neq g_j} \frac{\sigma_{g_i g_j}(g)}{\sigma_{g_i g_j}}$ | $\sigma_{g_i g_j}$ is the number of shortest paths between $g_i$ and $g_j$ and $\sigma_{g_i g_j}(g)$ is the number of shortest paths between $g_i$ and $g_j$ passing through $g$ . Shortest paths via metabolic interactions.                  |
| Betweenness centrality related to transcriptional regulation interactions | $inbetreg(g) = \sum_{g_i \neq g \neq g_j} \frac{\sigma_{g_i g_j}(g)}{\sigma_{g_i g_j}}$ | $\sigma_{g_i g_j}$ is the number of shortest paths between $g_i$ and $g_j$ and $\sigma_{g_i g_j}(g)$ is the number of shortest paths between $g_i$ and $g_j$ passing through $g$ . Shortest paths via transcriptional regulation interactions. |
| Closeness centrality                                                      | $cent = \frac{n}{\sum_{g_j} d(g, g_j)}$                                                 | $d(g, g_j)$ is the shortest distance via all types of interactions between genes $g$ and $g_j$ ; $n$ is the number of genes in the network                                                                                                     |
| Identicalness                                                             | $ident$                                                                                 | Number of genes with identical network topological characteristics                                                                                                                                                                             |
