# Supplementary material for: A machine learning approach for genome-wide prediction of morbid and druggable human genes based on systems-level data
Source: PubMed Central journal article supplement (PMC3045802; doi:10.1186/1471-2164-11-s5-s9), 2010-12-22
Supplement: 1471-2164-11-S5-S9-S3.pdf [file 1471-2164-11-S5-S9-S3.pdf]

**A. Parameters (\*\*) of the decision tree-based meta-classifier used to predict morbid and druggable genes (based on the graphic user interface of WEKA software package) :**

Meta-classifier: Vote

\*\*classifiers: 8 weka.classifiers.Classifier (decision tree classifiers with bootstrap aggregating [bagging] approach as described below)

\*\*combinationRule: Average of Probabilities

\*\*debug: False

\*\*seed: 1

-- We applied the class "weka.classifiers.meta.Bagging" (bootstrap aggregating [bagging]) approach to each classifier (see details in the section "Methods" in paper) with the following parameters:

\*\*bagSizePercent: 100

\*\*calcOutOfBag: false

\*\*classifier: one of the 7 decision tree classifiers whose parameters are described below.

\*\*debug: False

\*\*numIterations: 20

\*\*seed: 1

Parameters of the 7 bagged decision tree classifiers:

1. REPTree

\*\*debug: False

\*\*maxDepth: -1

\*\*minNum: 2.0

\*\*minVarianceProp: 0.0010

\*\*noPruning: False

\*\*numFolds: 3

\*\*seed: 1

2. Random Tree

\*\*KValue: 1

\*\*debug: false

\*\*maxDepth: 0

\*\*minNum: 1.0

\*\*seed: 1

3. Random Forest

\*\*debug: False

\*\*maxDepth: 0

\*\*numFeatures: 0

\*\*numTrees: 10

seed: 1

4. J48

\*\*binarySplits: False

\*\*confidenceFactor: 0.5

\*\*debug: False

\*\*minNumObj: 32

\*\*numFolds: 3

\*\*reducedErrorPruning: False

\*\*saveInstanceData: False

\*\*seed: 1

\*\*unpruned : False

\*\*useLaplace: False

5. Best-first decision tree (BFtree)

\*\*debug: False

\*\*heuristic: True

\*\*minNumObj: 32

```
**numFoldsPruning: 5
**pruningStrategy: Post-pruning
**seed: 1
**sizePer: 1.0
**useErrorRate: True
**useGini: True
**useOneSE: False
```

```
6. Logistic model tree (LMT)
**convertNominal: False
**debug: False
**errorOnProbabilities: False
**fastRegression: True
**minNumInstances: 15
**numBoostingIterations: -1
**splitOnResiduals: False
**useAIC: False
**weightTrimBeta: 0.0
```

```
7. Alternating decision tree (ADtree)
**debug: False
**numOfBoostingIterations: 25
**randomSeed: 0
**saveInstanceData: False
**searchPath: Expand the heaviest path
```

**B. Parameters (\*\*) of the J48 classifier used to generated the decision trees for determination of cellular rules for morbidity and druggability (based on the graphic user interface of WEKA software package):**

```
**binarySplits: False
** confidenceFactor: 0.5
**debug: False
**minNumObj: 128 (morbidity) or 32 (druggability)
**numFolds: 3
**reducedErrorPruning: False
**saveInstanceData: False
**seed: 1
**unpruned : False
**useLaplace: False
```
